# Supplementary material for: Drosophila Ninjurin A Induces Nonapoptotic Cell Death
Source: PubMed Central journal article supplement (PMC3460944; doi:10.1371/journal.pone.0044567), 2012-09-28
Supplement: pone.0044567.s002.pdf [file pone.0044567.s002.pdf]

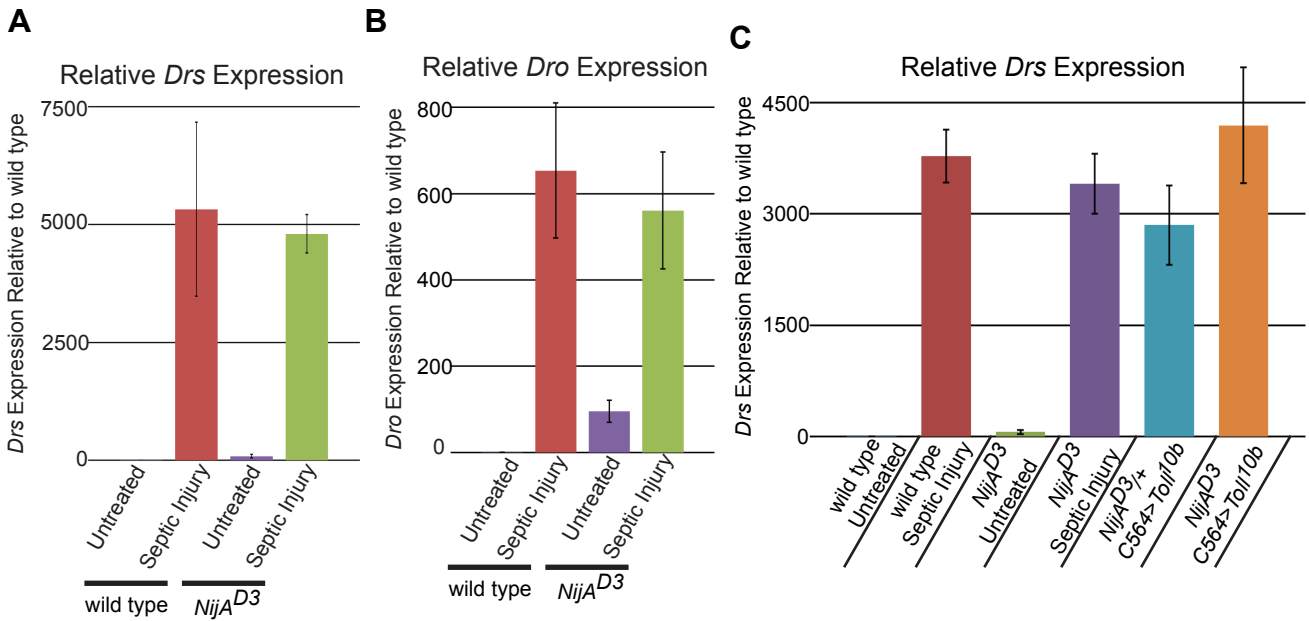

### Supporting Information S2. *NijA* is not required for Toll-mediated antimicrobial peptide induction.

(A-B) qPCR analysis of relative *Drosomyacin* (*Drs*, A) expression or *Drosocin* (*Dro*, B) expression in male third instar larvae after septic injury with *M. luteus*. *NijA<sup>D3</sup>* homozygotes were able to respond to immune challenge by upregulating both antimicrobial peptides similarly to wild type. (C) qPCR analysis of relative *Drosomyacin* expression after septic injury, or in *C564>Toll<sup>10b</sup>* larvae where *Tl* is genetically activated in the fat body. *NijA<sup>D3</sup>* homozygous mutants were able to respond to *Tl* gain-of-function in the fat body by increasing *Drosomyacin* to levels similar to heterozygous sibling controls. The slight increases in *Drs* and *Dro* observed in *NijA<sup>D3</sup>* untreated larvae in all three panels are not statistically significant.

#### Methods:

Larvae were pierced with a fine needle (Fine Science Tools) dipped in a log-phase growth culture of *M. luteus* in LB. qPCR was performed as described in Materials and Methods, except that 2 $\mu$ l of the cDNA pools were primed with validated primers sets for *rp49* ( $R^2 < 0.99$ ), *Drosocin* ( $R^2 < 0.98$ ), and *Drosomyacin* ( $R^2 < 0.99$ ), as previously described by [1]. All values are reported relative to untreated wild-type samples. Each sample was run in triplicate, and a minimum of three independent biological replicates was performed per condition.

1. Leulier F, Lhocine N, Lemaitre B, Meier P (2006) The *Drosophila* inhibitor of apoptosis protein DIAP2 functions in innate immunity and is essential to resist gram-negative bacterial infection. *Mol Cell Biol* 26: 7821-7831.
