# Supplementary material for: Drosophila Ninjurin A Induces Nonapoptotic Cell Death
Source: PubMed Central journal article supplement (PMC3460944; doi:10.1371/journal.pone.0044567), 2012-09-28
Supplement: pone.0044567.s006.pdf [file pone.0044567.s006.pdf]

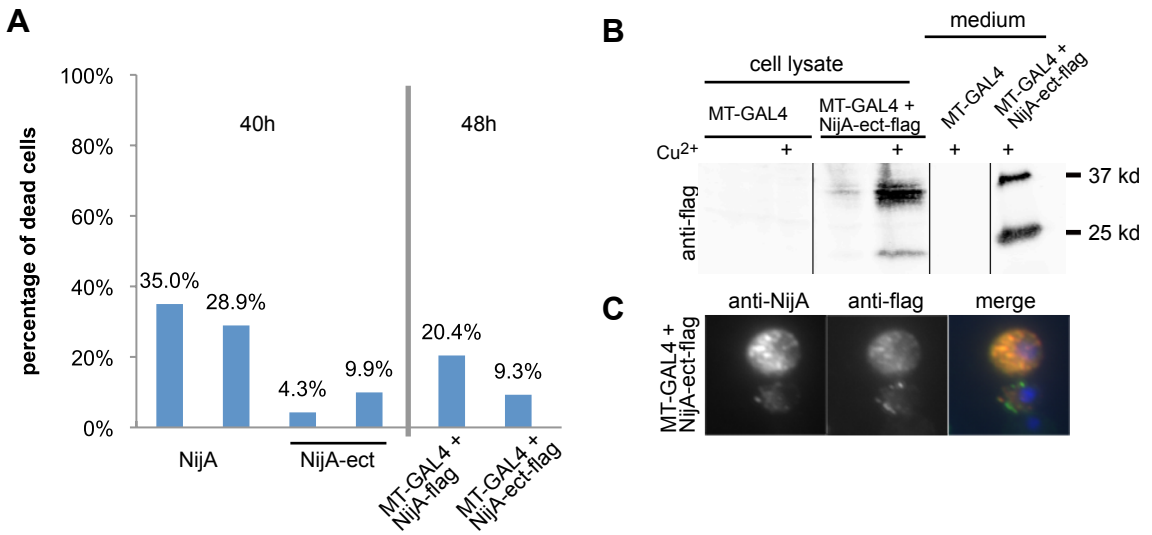

**Supporting Information S6. The secreted ectodomain of *NijA* does not induce cell death.**

**(A)** Cells were transfected with *pRmHa3-NijA* (columns 1 and 2) or *pRmHa3-NijA-ectodomain* (columns 3 and 4) and induced for 40h. To express C-terminal flag-tagged forms, cells were co-transfected with *pRmHa3-GAL4* and *UAS-NijA-flag* (column 5) or *UAS-NijA-ecto-flag* (column 6) and induced for 48 hrs. Percentage of dead cells was determined by counting trypan blue positive cells. **(B)** *NijA* ectodomain was expressed and secreted into the medium. Western blot with *anti-flag* was performed on cell lysate and medium collected from cells transfected with *pRmHa3-GAL4* and *UAS-NijA-ecto-flag* or *pRmHa3-GAL4* alone (control). **(C)** Localization of *NijA-ecto-flag* shown by immunofluorescence staining with *anti-NijA* (red) and *anti-flag* (green). Cell nuclei were stained in blue by DAPI.
